# Supplementary material for: Association Between Chiropractic Use and Opioid Receipt Among Patients with Spinal Pain: A Systematic Review and Meta-analysis
Source: Oxford University Press journal article supplement (doi:10.1093/pm/pnz219), 2019-07-30
Supplement: pnz219_supplementary_data.docx [file pnz219_supplementary_data.docx]

Search Strategy

Ovid Medline: from 1946 to April 18, 2018

| # | Searches | Results |
| --- | --- | --- |
| 1 | exp Chiropractic/ or Manipulation, Chiropractic/ | 3885 |
| 2 | (chiropra* or ch$irotherapy).af. | 8291 |
| 3 | 1 or 2 | 8291 |
| 4 | exp Analgesics, Opioid/ | 103944 |
| 5 | (Opioid or Opioids or Opioid* or Opiate*).af. | 114618 |
| 6 | exp Opioid-Related Disorders/ | 22589 |
| 7 | exp Narcotics/ or narcotic*.mp. | 142340 |
| 8 | 4 or 5 or 6 or 7 | 193866 |
| 9 | 3 and 8 | 54 |
